# Supplementary material for: A Risk Score Model Based on Nine Differentially Methylated mRNAs for Predicting Prognosis of Patients with Clear Cell Renal Cell Carcinoma
Source: Hindawi journal article supplement (doi:10.1155/2021/8863799), 2021-01-14

**A**

lambda= 0.03557  
cvi= -557.1598

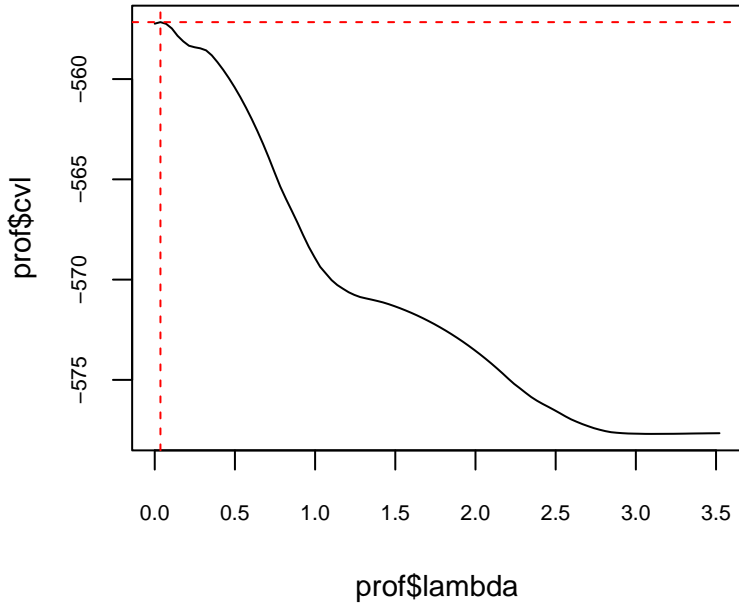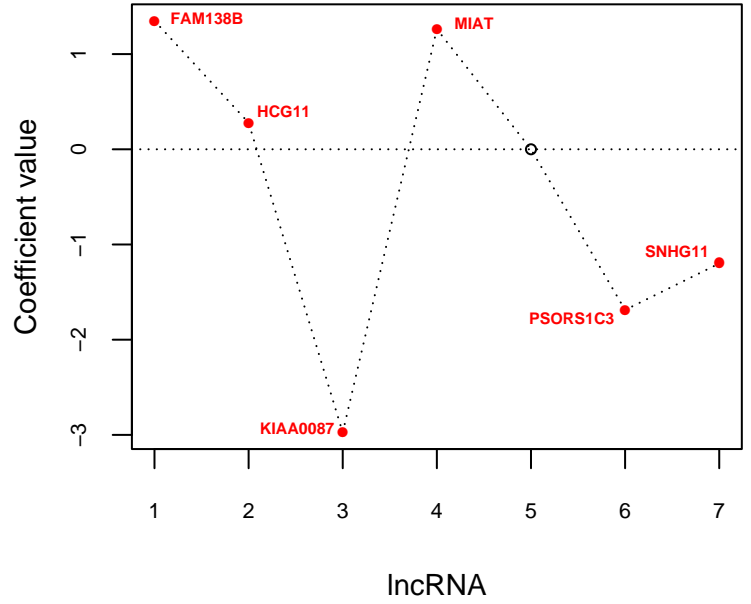**B**

lambda= 0.51184  
cvi= -546.8306

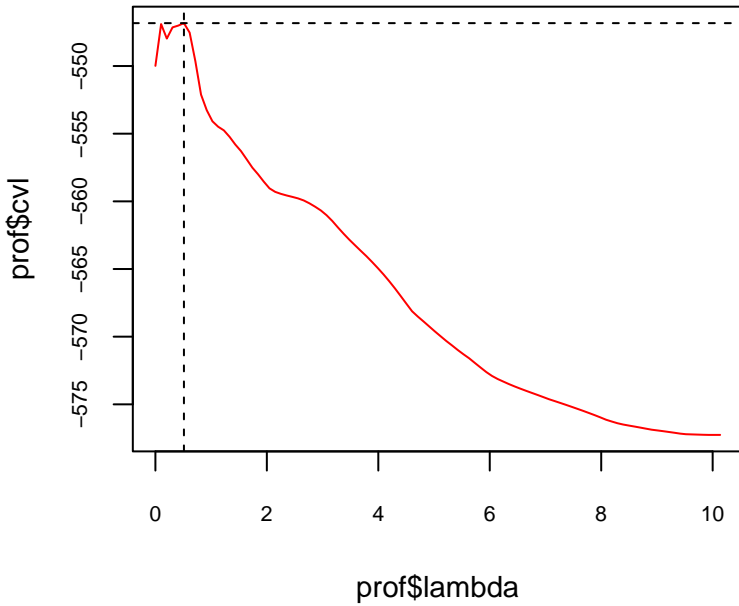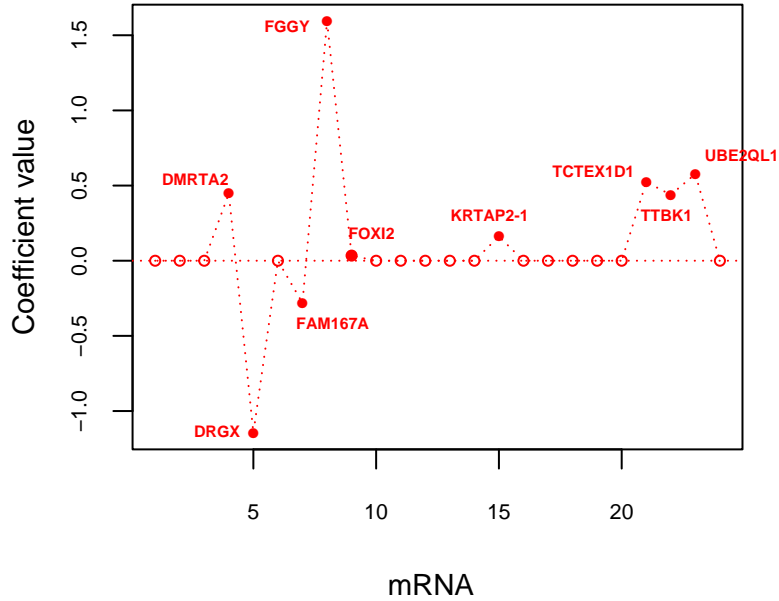

Supplement: f1 [file 8863799.f1.pdf]
